# Supplementary material
Source: PubMed Central journal article supplement (PMC5338656)
Supplement: supp_pp.16.01185_PP2016-01185DR1_Supplemental_Figures.pdf [file supp_pp.16.01185_PP2016-01185DR1_Supplemental_Figures.pdf]

SolyPMEI ...DLIDEICSKTIDV...KVCYYALREDFRSKG...AKPEGLMAIVILLSQKNATFACNLVSTLLKG...TTFPKIKSRYTICLGNYNK 78  
 VvPMEI1 KIANNELTEICSTIQD...PSFCVQALKSDPRT...ANADLKGLAQI SI ILLAKASA TKTTTLI TSLVEKAND...PKKGRYETCPENYID 82  
 AdPMEI .AENHLISEICPKTRN...PSLCLQALESDPRS...ASKDLKGLGQF SILLIQAASAKQTSKII ASLNTQATD...PKKGRYETCSENYAD 81  
 AtPMEI1 .ITSSEMSTICDKTLN...PSFCCLKFL...NTKF...ASFNLQALAKTTLDSTQARATQTLKLLQSI IDGGVD...PRKIA YRSCVEYES 79  
 AtPMEI2 ...QVADIKAI CGKAKN...QSFCTSYMKS NPKT...SGADLQTLANTIFGSAQTSASEGFRKI QSLVKTATN...PTMKIAYTSCVQHYKS 80  
**AtPMEI12** ATAQTLIQDSCKKFAKDPQLSYDFCVNSLTQDFQS...KAATTLLESVLASIKTA AAKT TNLKGIVAQDLKD...QRQDIVELIKICLGFYND 89  
 BoPMEI1 ...SRMMSLCSHTAY...PSLCOPLIKRITNPRR...ATHKTI QALEAKTKIALADAARYKNGNQ...AIATCYAVFSD 67  
 CaPMEI1 .TNTEFIRTSCKSTTY...ENLQFSSLSSRASAI G...ASPQLLAHESLTVSLETAQSTSSMLLKL AHG...QGMTPFEIGAMHDCVEEISD 82  
**AtPMEI10** QTNLDYIKTSCNITLY...KTI CVNSLSPYASTIR...SNPKLAVIALNLTLLSSAKSA SKFVKNI SHG...GGLTRIEVVAVADCVEEIGD 83  
**AtPMEI11** ...AINFIQASCKATTY...FTVCVNSLTGYANSIQ...TSPRRLAETALNVTVTAQSTKVFVWRLGRF...TSLKKFEICAVKDCIEEIH 81  
 AtPMEI4 QNHHTYVKTACNSTTY...PTMCYNCLSSYSSTIK...SDPIKLC TTSNLNLVKS AKNA TLVSNLL...QKAKAA...KSHVEVSLKDCVDEM 84  
 At5g51520 QNHKTFFVKTACNSTTY...FDKCYKSLSSYSSTIK...SDPIKLC TTSNLNLVKS AKNA TLVSNLL...QKAKAA...KSHVEVSLKDCVDEM 84  
 AtPMEI3 ...AEDIVHSSCEHAS Y...PSL CVRTLSSYSGPTITN...RRDLQAQAKI SLSHAQSA AKKLAVVRDSVVG...KKCEK PALLVDCVEMIGD 81  
 AtPMEI6 TQYSTYVRNACNVTRY...NRLCVRTLWPFIVAR...NNTSKWARASVAVITTDKRVLRLL LKTQRSVAGES...ERIALSDCFEILFVD 82  
 At4g15750 RADEELIKTECNHTEYQN...VCLFCLLEADPISFN...IDRAGLVNI IICHLGSQDLVLTINTV TSLKLMKGEGE...ANENVLKD CVTCFPAI 83  
 At5g50040 ASATTYIDAIQCSVTD...KAFCAKTLNAYPAAG...SATSQFQAATATLNLAISYADKSAGFTGNAKEN...PTIKTCF AASCDAFVT 81  
 AtPMEI5 ...PARDIDKLCCKETDVP...FCLKYLGTDEPRIPAAR...DLTDVLLI AITQSKMQVDLA TTHI DRVRRKFNPHG...RFRFVCKKNYGI 81  
 NtCIF ...NNLVEETTCNTPN...YQLCLKTL LSKRS...ATGDITTLALIMVDAIKAKANCAAVTI SKLRHSNPP...AAWKGPLKNCAPSYK 79  
 NtVIF ...NNTCRATTN...YPLCLTTLHSDPRTSEAGADLTTGLVMYDAVKLKSIEIMKSI KKLKSNP...EIRIPLSQCVEIVYA 76  
 At3g17140 ...NNTCRATTN...YPLCLTTLHSDPRTSEAGADLTTGLVMYDAVKLKSIEIMKSI KKLKSNP...EIRIPLSQCVEIVYA 79

SolyPMEI **ASDI**VAKMPDLLKSKD...YYGLSANASAAIREPS...TCDDNFIEPPVEVPKLEASDNLRLGLIDVILVVLGFL...147  
 VvPMEI1 SISSLDDCTQSVSSRDYVS.LN...FQSAAMDGPV...TCILDSFEGPPKDPSELPKSEDLIHLC SII LAISKFLIG...153  
 AdPMEI1 AIDSLGQAKQFLTSGDYNS.LN...IYASAFDFGAG...TCEDSEFEGFPNIPTQLHQADLKLLEDLCDIVLVISNMLPGSK...154  
 AtPMEI1 AIGNLEEA FEHLASGDGMG.MN...MKVSAAALDGAD...TCILDVVKRLRSVDSSVNNNS KTIKNLCGIALVISNMLPRN...151  
 AtPMEI2 AISSLNDAKQSLASGDGKG.LN...IKVSAAMEGFP...TCEQDMADFK.VDPSAVKNS GDFQNICIGVILVISNML...148  
**AtPMEI12** ANDDLTTALANIKSRD...YOGANINLSAALDVPG...TCEDDFKEAKKTSPIITNENS.I LFKTILLIPLAFNML...157  
 BoPMEI1 AVYNLANARKSIRKRD...VMAMNTFITA AVSDYG...VCVEGFIDAN...QVN...TVQNVAVDLRKRISNMLLSTLV...134  
 CaPMEI1 TVVGLRKS LGEMKQLR...G.KD.FDLKMNDIQTWVSAALTDDE...TCTEGF DG...KVMNGKVKTVVRGKILEVAHITSNALALINRL...160  
**AtPMEI10** SVTSLQDSIRELDSIN.YKD.SAKFEMVMSDVETWVSAALTDDE...TCMDGFP...LVKTA VDLVRRHVVEVARITSNALAL...159  
**AtPMEI11** AVDRITMSIHEVQKMGCSAKG.RDQFWFHMSNAQTWVSAALTDDE...TCSDGFAG...RVMDGRVKN SVRARILNLGRCTSNALAL...160  
 AtPMEI4 TIDELKQAVAE MKYVR...GG.GKTTEEHLKNVKTWVSSALTDDE...TC TDGFEE...GRVNVETK KVKKAI SELSKTITSNTLAL LTHY...164  
 At5g51520 TIEELKQAITEMKNLQ...DG.G.SMAEHTNVRTWVSSALTDDE...TC TDGFEE...VKNKETK KVKVNVVELEPTITSNLAL...167  
 AtPMEI3 SVDEL SRTLGLVKHLRVSGGSAKEFRWQMSNAQTWVSAALTDDE...TC LDGFQGM...DGEIKTEVKQWMTKVARVITSNALALY...160  
 AtPMEI6 SLDNLYKSLAVLRTLN...ADEFQRQISDLATWVSAALTDDE...TC LDGFEE...SRTRTVRVRKATKCMRLCSNALAL...157  
 At4g15750 AQLRLQGANIDLITLN...YDKAYELVKTALNYP...TCENLQKLFKDS...SIVYDDILAYSQITSVAKTILHRL...152  
 At5g50040 ISKSLK...SAA SELKISPD TANYDVMVSDS IATVKNLVKNTDNS...SKVMTMTL KMEKLLTIA...143  
 AtPMEI5 ASAREHTAWELGLQKSFWDVEKLARIG...TNAVID...CENVWR...RDGPIQTSPLTFYNNMVFKLSGII LLIFNK...149  
 NtCIF ILLASLPEAIEALTKG...DKPFAE DGMVGS SDAQ...EGEEYFK...GSKSPFSALNIAVHELSDVGRIVFNML...147  
 NtVIF VLHADVTVAEALKRG...VPKFAE NGMVDVAEAE...CEFSFKYNGLVSPVSDMKNELIELSSVAKSIIRML...146  
 At3g17140 IVDVVHTAITISIGN...PKBAEGAVVDAGVEAS...ICEGFTK...GQSPLTSLTQRMEKICDVTRAIRML...86

**Figure S1. Alignment of amino acid sequences of putative *Arabidopsis* invertase/pectin methylesterase inhibitor isoforms with an altered expression during *Botrytis* infection.** The functionally characterized PMEs and INs are also included. PKFAE motif, typical of invertase inhibitors is highlighted by red box and the SAA motif typical of PMEs is highlighted by black box. Highlight homology level: 100% black; >75% pink; >50% light blue; >33% yellow. The defence-related AtPME110, AtPME111 and AtPME112 selected in this study for further characterization are highlighted in bold.

|          |                                                                                                                                                                                                                                                                                                                                                                                                                                        |     |
|----------|----------------------------------------------------------------------------------------------------------------------------------------------------------------------------------------------------------------------------------------------------------------------------------------------------------------------------------------------------------------------------------------------------------------------------------------|-----|
| AtPMEI10 | <b>MN</b> ILSQTQILHLS <b>T</b> AILLFITT SSSSLSPSSSSPSLSPSPSSSSPSSAPPSSLSPSSPPPLSLSPSSPPPPSSSSPLS                                                                                                                                                                                                                                                                                                                                       | 79  |
| AtPMEI11 | MAKQIFYTLFLFL <b>L</b> STAILTA.....                                                                                                                                                                                                                                                                                                                                                                                                    | 21  |
| AtPMEI12 | MKFLVSLVIFSLFLNGFATA.....                                                                                                                                                                                                                                                                                                                                                                                                              | 20  |
| <br>     |                                                                                                                                                                                                                                                                                                                                                                                                                                        |     |
| AtPMEI10 | SLSPSLSPSPSSSSPSSAPPSSLSPSSPPPLSLSPSSPPPPSSSSPLSSLSPSSSSSTYSNQTNLDY <b>I</b> K <b>T</b> SC <b>N</b> I <b>T</b> LY <b>K</b> .                                                                                                                                                                                                                                                                                                           | 158 |
| AtPMEI11 | .....SSAPRAAITSKRAINFI <b>Q</b> A <b>S</b> CKATTYP.                                                                                                                                                                                                                                                                                                                                                                                    | 49  |
| AtPMEI12 | .....QTL <b>I</b> Q <b>D</b> S <b>C</b> KKAF <b>K</b> D                                                                                                                                                                                                                                                                                                                                                                                | 35  |
| <br>     |                                                                                                                                                                                                                                                                                                                                                                                                                                        |     |
| AtPMEI10 | .....T <b>I</b> C <b>N</b> SLSPYAST <b>I</b> RSNP <b>Q</b> .K <b>L</b> AV <b>I</b> ALN <b>L</b> TLS <b>S</b> AK <b>S</b> ASK <b>F</b> V <b>K</b> NI <b>S</b> ..HGG <b>G</b> L <b>T</b> RL....E <b>V</b> V <b>A</b> V <b>A</b> D <b>C</b> V <b>E</b> E <b>I</b> G <b>D</b> SV                                                                                                                                                           | 226 |
| AtPMEI11 | .....T <b>V</b> C <b>V</b> NS <b>L</b> T <b>G</b> YANS <b>I</b> Q <b>T</b> SPR.R <b>L</b> A <b>E</b> TALN <b>V</b> T <b>V</b> T <b>Q</b> A <b>Q</b> ST <b>K</b> V <b>F</b> V <b>W</b> RL <b>G</b> ..R <b>F</b> T <b>S</b> L <b>K</b> KR....E <b>I</b> Q <b>A</b> V <b>K</b> D <b>C</b> I <b>E</b> E <b>I</b> H <b>D</b> AV                                                                                                             | 117 |
| AtPMEI12 | P <b>Q</b> LSYDFC <b>V</b> NS <b>L</b> T <b>Q</b> .....D <b>P</b> Q <b>S</b> KA <b>A</b> T <b>L</b> ES <b>L</b> V <b>L</b> AS <b>T</b> K <b>T</b> AA <b>K</b> IT <b>N</b> L <b>K</b> G <b>I</b> V <b>A</b> Q <b>D</b> L <b>K</b> D <b>Q</b> RY <b>Q</b> D <b>I</b> VE <b>D</b> L <b>K</b> L <b>C</b> L <b>G</b> F <b>Y</b> N <b>D</b> AN                                                                                               | 108 |
| <br>     |                                                                                                                                                                                                                                                                                                                                                                                                                                        |     |
| AtPMEI10 | T <b>S</b> L <b>Q</b> D <b>S</b> I <b>R</b> E <b>L</b> D <b>S</b> I <b>N</b> Y <b>K</b> D <b>S</b> A <b>K</b> ....F <b>E</b> M <b>V</b> M <b>S</b> D <b>V</b> E <b>T</b> W <b>S</b> A <b>A</b> L <b>T</b> N <b>D</b> D <b>T</b> C <b>M</b> D <b>G</b> F <b>S</b> ..L <b>V</b> K <b>T</b> A <b>V</b> K <b>D</b> L <b>V</b> R <b>R</b> H <b>V</b> V <b>E</b> V <b>A</b> R <b>L</b> T <b>S</b> N <b>A</b> L <b>A</b> L                    | 300 |
| AtPMEI11 | D <b>R</b> L <b>T</b> M <b>S</b> I <b>H</b> E <b>V</b> K <b>M</b> C <b>G</b> ...S <b>A</b> K <b>G</b> R <b>D</b> Q <b>F</b> W <b>F</b> H <b>M</b> S <b>N</b> A <b>Q</b> T <b>W</b> T <b>S</b> A <b>A</b> L <b>T</b> N <b>A</b> N <b>T</b> C <b>S</b> D <b>G</b> F <b>A</b> G <b>R</b> V <b>M</b> D <b>G</b> R <b>V</b> K <b>N</b> S <b>V</b> R <b>A</b> R <b>I</b> L <b>N</b> L <b>G</b> R <b>G</b> T <b>S</b> N <b>A</b> L <b>A</b> L | 194 |
| AtPMEI12 | D <b>D</b> L <b>T</b> T <b>A</b> L <b>A</b> N <b>I</b> K <b>S</b> R <b>D</b> .....Y <b>Q</b> G <b>.</b> A <b>N</b> I <b>N</b> L <b>S</b> A <b>A</b> L <b>D</b> V <b>P</b> G <b>N</b> C <b>E</b> D <b>D</b> E <b>K</b> ..E <b>A</b> K <b>K</b> T <b>S</b> P <b>I</b> T <b>N</b> E <b>N</b> S <b>I</b> L <b>F</b> K <b>T</b> I <b>L</b> I <b>P</b> ..L <b>A</b> F                                                                        | 170 |
| <br>     |                                                                                                                                                                                                                                                                                                                                                                                                                                        |     |
| AtPMEI10 | <b>I</b> N <b>M</b> Y <b>A</b> S <b>T</b> Q <b>E</b> N <b>F</b> S <b>..</b>                                                                                                                                                                                                                                                                                                                                                            | 312 |
| AtPMEI11 | <b>I</b> N <b>A</b> F <b>A</b> K <b>K</b> Y <b>.....</b>                                                                                                                                                                                                                                                                                                                                                                               | 202 |
| AtPMEI12 | <b>T</b> N <b>M</b> L <b>.....</b>                                                                                                                                                                                                                                                                                                                                                                                                     | 174 |

**Figure S2. Alignment of amino acidic sequences of AtPMEI10, AtPMEI11 and AtPMEI12.** The signal peptides are highlighted with a black rectangle. Highlight homology level: 100% black; >50% light blue

atgaacatcttatctcaaaccxaaatccttcatctctctatagctattcttctcttcatc  
M N I L S Q T Q I L H L S I A I L L F I  
acaacatcatcatcatcattatcaccatcatcatcaccatcattatcaccatcacca  
T T S S S S L S P S S S S P S L S P S P  
ccatcatcatcaccatcatcggcaccaccatcatcattatcaccatcatcaccaccacca  
P S S S P S S A P P S S L S P S S P P P  
ctatcattatcaccatcatcaccaccaccaccgcccaccatcatcatcacctctatcatca  
L S L S P S S P P P P P S S S P L S S  
ttatcaccatcattatcaccatcaccaccatcatcatcaccatcatcggcaccaccatca  
L S P S L S P S P P S S S P S S A P P S  
tcattatcaccatcatcaccaccaccactatcattatcaccatcatcaccaccaccaccg  
S L S P S S P P P P L S L S P S S P P P P  
ccaccatcatcatcacctctatcatcattatcaccatcatcattcatcaacataactca  
P P S S S P L S S L S P S S S S S T Y S  
aatcaaaccaacttagattacatcaaaacatcatgtaacattacactctacaaaaccatt  
N Q T N L D Y I K T S C N I T L Y K T I  
tgctacaactctctatctccttaagcctcaacaatccggtccaaccctcaaaaactcgc  
C Y N S L S P Y A S T I R S N P Q K L A  
gtcatcgccctcaatctcacctctcatccgccaatctgctccaaattcgtcaaaaac  
V I A L N L T L S S A K S A S K F V K N  
atatctcacggaggtggtctatcttggaaagttagttgcggttgctgattgcggtgaa  
I S H G G G L T R L E V V A V A D C V E  
gagattgggagactcgggtgacttcgcttcaagattcgataaggggaattggattctatcaac  
E I G D S V T S L Q D S I R E L D S I N  
tataaagatagtgcaaagtttgagatgggtatgtcggatggtgaaacatggggttagtgct  
Y K D S A K F E M V M S D V E T W V S A  
gctctcacgaatgatgacacatgtatggatgggttcagtctagttaaaacggccgtgaaa  
A L T N D D T C M D G F S L V K T A V K  
gatttgggttcgacgacatggtggttgaggttagctcggcttactagcaacgcggttgctctc  
D L V R R H V V E V A R L T S N A L A L  
attaatatgtacgcctctacgcaagaaaacttttcttaa  
I N M Y A S T Q E N F S -

**Figure S3. Nucleotide and amino acid sequences of AtPMEI10.** The signal peptide is in yellow. The Serine-Proline-rich repeat (SPRR) region ( in grey) of the inhibitor starts and ends with SSSS domains (in red), includes SL(S)SPS(L)-SP(A)PPS(L) and -SPP repeated domains (in fuchsia) and includes interspersed PPPP motifs ( in green) . The PME1 domain of the protein is indicated in cyano.

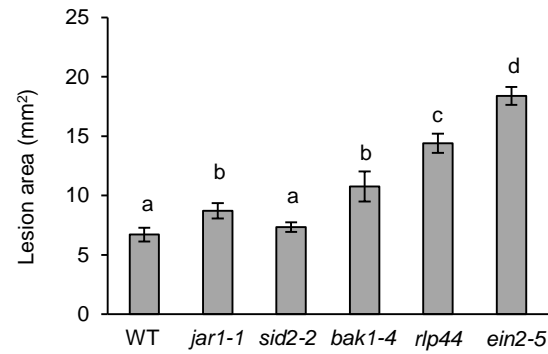

**Figure S4. Disease symptoms produced by *Botrytis* infection in immune signaling mutants.** *Arabidopsis* WT and the mutants indicated were inoculated with *Botrytis* and lesion area were determined at 48 hour post inoculation (hpi). The values are mean  $\pm$  SE. (n=36). The different letters indicate data sets significantly different according to ANOVA followed by Tukey's test ( $P < 0.05$ ). The experiment was repeated three times with similar results.

### AtPME10

GGTGGTCACTGTTTTATTAAATTTCAGATTTGATTTATTTGGCTATATTTGCCGACTGATCTTTTTCTGTATCCACTCTGAATTTATTT  
TTCTTTTGGAAAGGATCTAGCTTCAATAAAAATGGGAATTATATAGCTGGACCAAAGTGTAGTTGGACGAATTAATTCATCATATACAACA  
GATTTAGAAAAAACAACATAAATCTTCAAAGGTCAGCCCTCTTACGGTATTTATGGAGTTTCATATAGATAACTAATTTATACAAC  
AATAAATACAATAAATAAATAAATAAAGTAAAAATAGTTTTTACCTCAATTTGCTTTCTTAGATTACTAATAAACGTGTATGCCTAAA  
TTAATCAATATCTAACATTTCTTAGATCTTAATAAACTTTAAGTATTTTCATAACATTTCTACTTAAATTAATTTTCATATCGACCCATT  
GTATGGAAGAAAAGTTCCATTGCTAAAATTTACGCAATTTAATGTATGAAAAATACCTTATATGTGAAAAATACTTAACTTAATAAA  
TTCAATTTAACAACTTCATATACAATAATTTATATTTTTCATAAATATTTTATAATCAATTAACGATTTCTTCCATACTTTAG  
AAATATGGGAATCCATACTCTTCGGCCTTAAAGATATATATATTTGGTCGTTTATGAGTAAAATATGTTTTTTGAAGCATATGTGACAA  
ATCCAGAATACGTTAAACATTTGAGCCGGATGTAATTTGTAAGCTTTCCCAAAAAACCTCAGCTTCAATCAAGTAAAAGTTATTAG  
ATATGATTGAGTTATTAATAGACTCAACCAATTTCTTTTTCACAAGTTTTCTTTTACGTATAATTTATTATATATATATACATGTT  
CTATATATACACACTATATATACATACATGCACATGCCATTAGTTTCCACTAGGCCATTCTCTTTTAAAGCAATCGACGCCAA  
AAAAGAAAACGACGATACAAA

### AtPME11

ATTCATTAGTCGCCAAATGAACAATTTTTTTTACATGTTATTTTGTAAACATCACCTCTATTATTCTATGCTTAATTTTTAACTTAATCT  
GTACATCTTTTGTCAATAATTAATGAGATACATACATTAGGGTTTATCAAAAAATATGAGATACACTAGTCGCCTAATTTGGTTACA  
TAGCATATCTTTGGACGTGGATCAGACTAATTAGAAGTGTACCTATTGTTGCAATTTGGAACGATTTTCAGGGTCAAATCCACTATCCATC  
TCTTTATGAATTTCAATTAATAGTCGCACAATCCAATTTCTATCTTTTGTAGTTGCCGGTGAATATAAAAATCTTTTGATATATGAC  
GTAAAGGCAAAAGATACTTTGCGATGATAGTACAAATATGTATCCAAATACAAATATGATATATCTATACGTATATTTTTTTTTTTTGAAC  
ACATAAAGCGAATAAAAAATGAACATTTTGTAAATTTG TGACTGATGGTGTATGCTAAAATGTTTCATTATATTGGAATGGAGATGTAAA  
ATAAGTATACGTTGAAAATGCCATAATTCCTTGGAAATGAATCGATGATAAAGATCAACCTGTTTTTCATTATAACAACAATACAAAAGGT  
TAAACCATGTTTACACCAAAAAGTCCATTTCTGATGATCATTACGAAAAATCCTAGATATTCGTTTGTATTTTTGTTCTTTTTCATTCCCA  
TGTTACTTTTTGGGTCAAGAAGAAGAAATGAATATAATTTGCCATAGTACATTTCTTAATACCTAATAGCAGACAATTTCTGGTTATTTCCA  
ACTAATAATCTAGACCTCAGTTGAAAAACAATAATCAACCAAAGCGTCAAAGTCAAAGCATATCAATTTATTTCTATTATATAAACC  
TAAGAAAAACCAACGTACACCAAAGAGTACGTACTAGTCCACTATAAAAACTCAAACCAACTCTTTACCTCTCCACAAATATTATCT  
AAACCAAAACATTTCAAAAGA

### AtPME12

CAATCTTCCGTATTACAAAGACCGAAAAAATACAATAAAAGTAAGAATACATT TGTCAAAATAAATGCTAAAAGAGATAAGAAATAT  
AACTTTTTTTTTTTTTTCTGATGTTCTTTTATAAACGTAAAGTTTTATTAACCTTAATTAATCTTTACACCAAATCCAGACCAGAAA  
CAACAGCAAGAAAAAAACTTTGATTTGGTTGGAAGGTGGGATCGAACGATAAATCCATAATCTAACATTTGAACAGAGTGTGCACAAT  
GGAATGGAGAGTTGCTAAGAAAAATATTATGTCATGTTGATCAATATCATAAACAATTTATAAATAATCTAAACATAAACGAACAAT  
TGTTAAAAAATGTTATTGTCATGTTGGCCAATATCATAAACAATTAATAAATAATCTAAACATAAACGAACAATTTGTTAAAAAATAT  
TATCTTTAATTTCTGTTATAAAAAATCAAAATGTTGATGAATGCATAATGATGATGACAAACGGCATAATGGGAGAAAAGAGTTCTCATTAT  
TTCTGTTATGATGATTTTGGAAACACTCACAATCGTTGACTAAATTTGTGAATATATGGAAAACAATAAATCAATAATCTTTGATT  
TTCTTAAATGTTGTTCAAAATAGCATAATGGTAGAAGAGATATCAATTTTGAAGTATGAATGATTTTTAGAAAATGGAATTACTTTG  
AACGTGGGTATATGGAAAGCAAAATATTGTCATGTTGACCAATTTCCAAACAATAAATATGAATTTAGGAAAGAAATCATGAAAAGTGAAT  
ATCTTACCATTATTCATTAAGTGAATAATATCTCAATATGAATGATATCTATTTCAAATTTGGGAACCTTTCCAAATTTTCAACAAT  
TACCATAAAATTTATTTTTCTGTTTTACTATAAATTTGAACACAGGGTGACAAAAATTTTCATCAATCAATTTCTAACTTTCTCTGCTTC  
TTCTCAAAGTGAAAAACAAAA

**Figure S5. Analysis of cis-acting DNA elements with regulatory functions in plant immunity in the 5' flanking regions of *AtPME10*, *AtPME11*, *AtPME12*.** About 1500 bp have been analysed for each gene. Green indicated Ethylene Responsive Element (ERE); Yellow indicated Brassinosteroid response element (BRRE); Fuchsia indicated Jasmonate responsive elements (JARE); Gray indicated responsive elements reported as involved in plant defence.

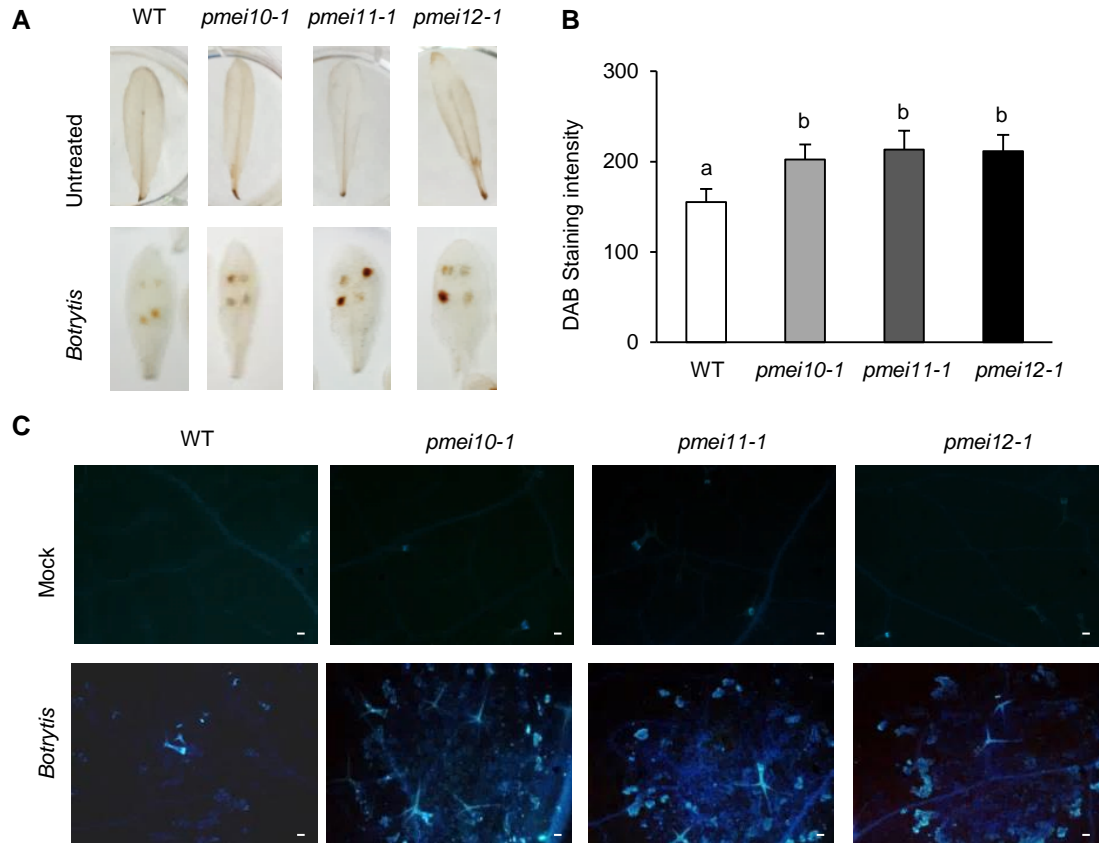

**Figure S6. Arabidopsis *pmei10-1*, *pmei11-1* and *pmei12-1* mutants are not defective in H<sub>2</sub>O<sub>2</sub> and callose accumulation against *Botrytis*.** Representative pictures of untreated and *Botrytis* treated leaves of *pmei* mutants and WT plants (A) and accumulation of H<sub>2</sub>O<sub>2</sub> (B). Untreated and *Botrytis*-treated leaves at 48 hour post infection were stained with 3,3'-diaminobenzidine and the intensity of the dark staining (mean gray value) quantified using IMAGEJ. The different letters indicate datasets significantly different according to analysis of variance (ANOVA) followed by Tukey's test ( $P < 0.01$ ). C, Microphotographs indicating callose deposition at the level of lesion area produced by *Botrytis* at 48 hpi on *pmei* mutants and WT plants. The leaves were stained with aniline blue and callose deposition was visualized by epifluorescence microscopy. (scale bars = 100 $\mu$ m). The experiments were repeated three times with similar results.

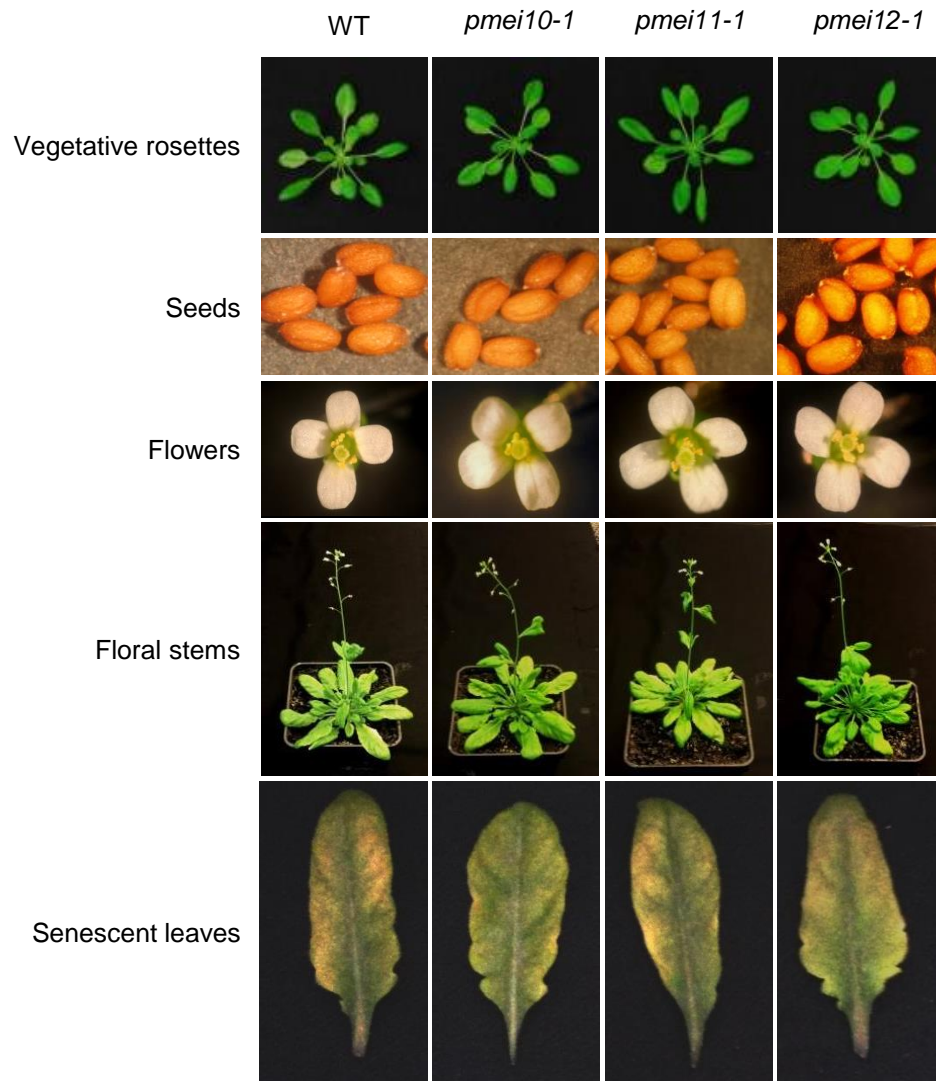

**Figure S7. Representative pictures illustrating the morphology of different tissues of *pmei10-1*, *pmei11-1* and *pmei12-1* mutants and WT plants.** Vegetative rosettes (25 days old plants), seeds, flowers (40-days old plants), floral stems (40-days old plants), senescent leaves (65 days old plants) of *pmei10-1*, *pmei11-1* and *pmei12-1* plants were compared with WT.

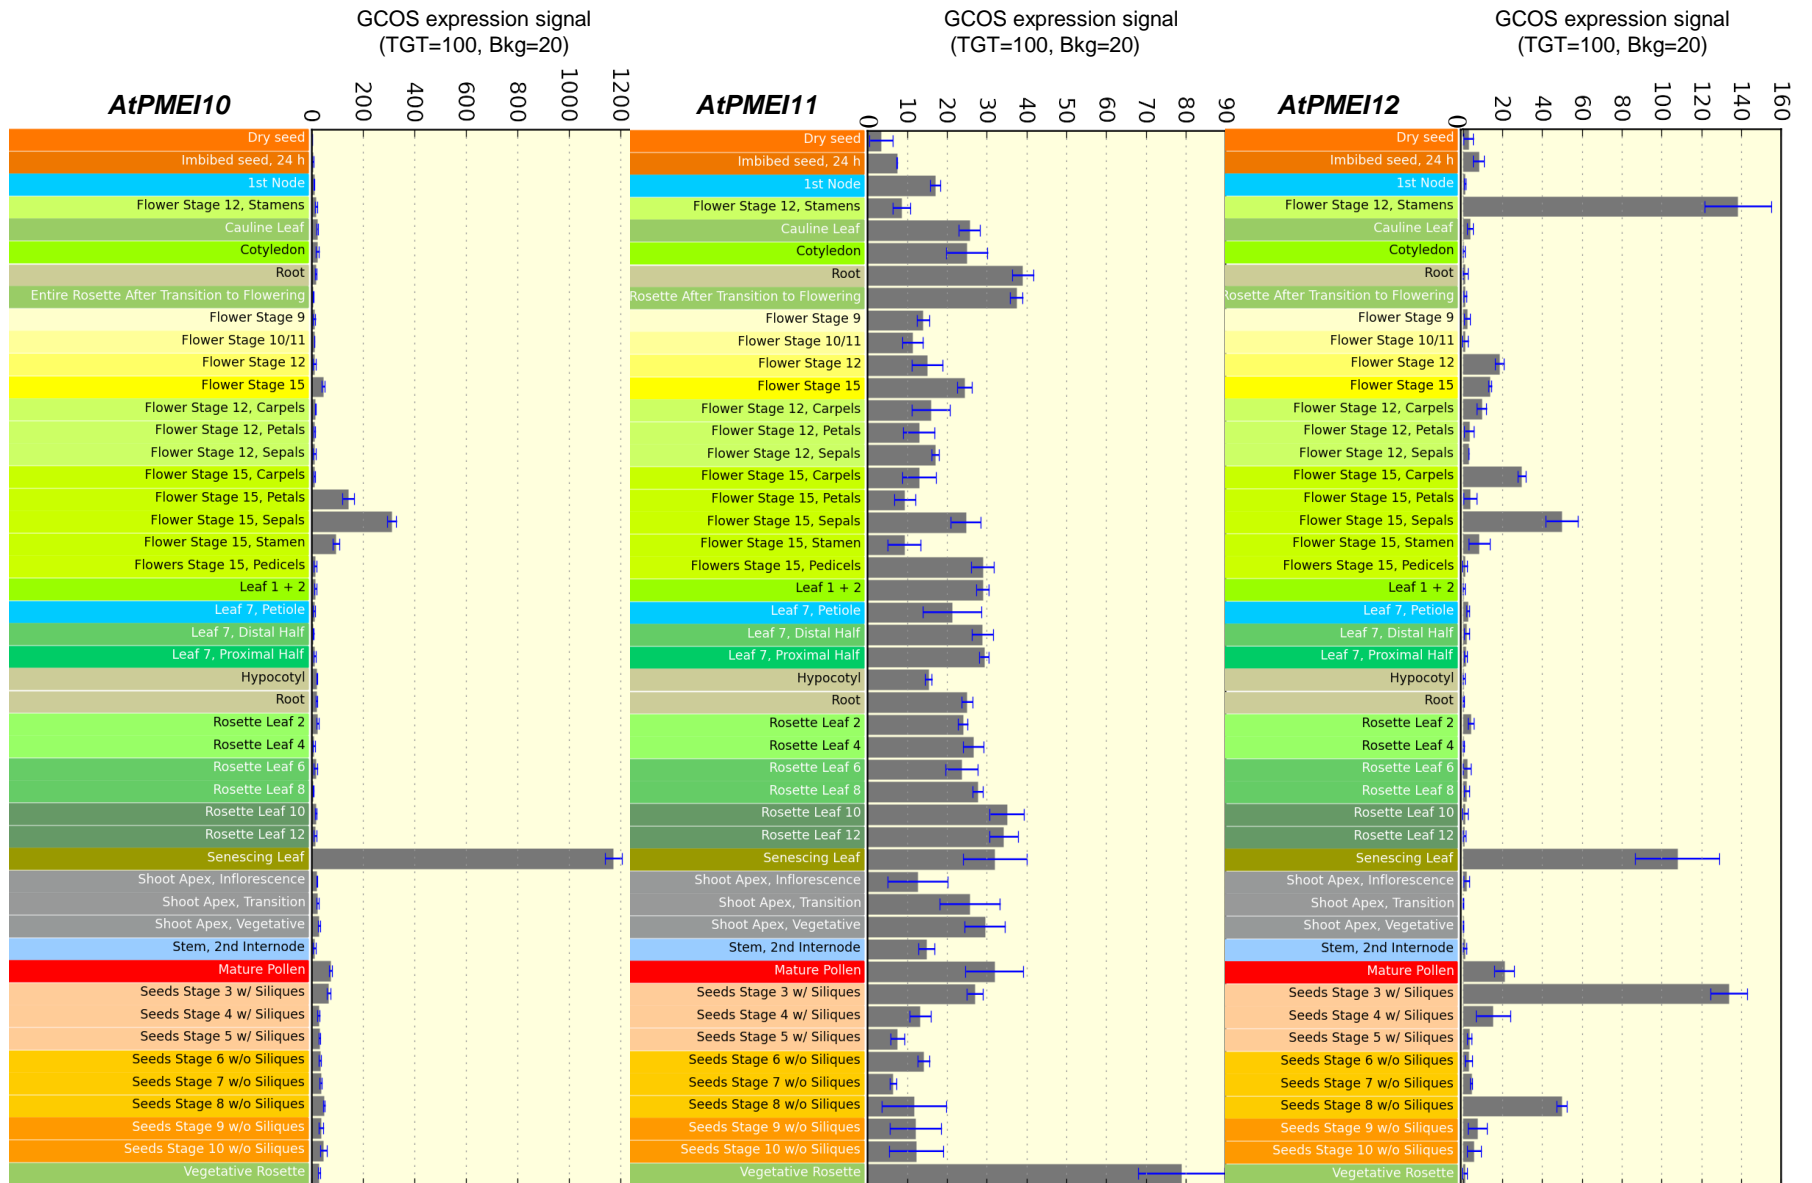

**Figure S8. *AtPMEI10*, *AtPMEI11* and *AtPMEI12* gene expression in different tissues and developmental stages of Arabidopsis.** ATH1 microarray data were gathered and processed using the eFP browser (Winter et al., 2007). Expression signals were generated by the eFP browser using the Gene Chip Operating Signal (GCOS) using target intensity (TGT) and background (bkg) values as indicated in figure.



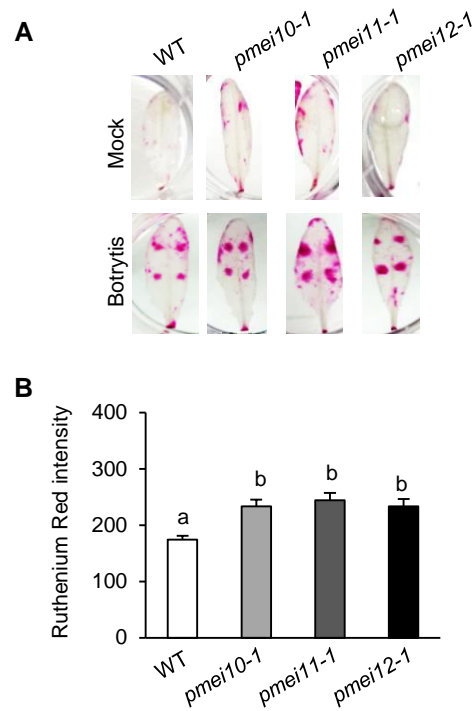

**Figure S9. Histochemical evidence indicating the control of PME activity by AtPMEI10, AtPMEI11 and AtPMEI12 during *Botrytis* infection.** Leaves of *Arabidopsis* WT and of *pmei* mutants were inoculated with *Botrytis* or mock and PME activity was evaluated at the level of lesion area (A) by staining leaves with ruthenium red and (B) by quantifying the mean gray value using IMAGEJ.

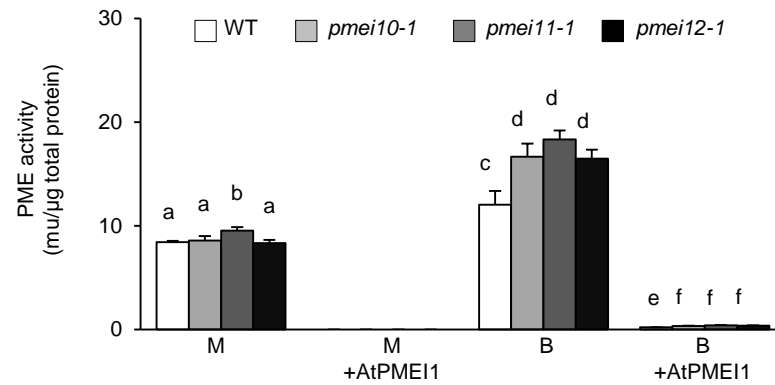

**Figure S10 Effect of exogenous addition of recombinant AtPME1 on PME activity at 48 hour post inoculation.** Value are mean  $\pm$  SD (n = 3). M = protein extracts from mock-inoculated leaves. B = protein extracts from *Botrytis* inoculated leaves. + AtPME1 = addition of AtPME1 to the relative protein extracts. mu = milliunits;

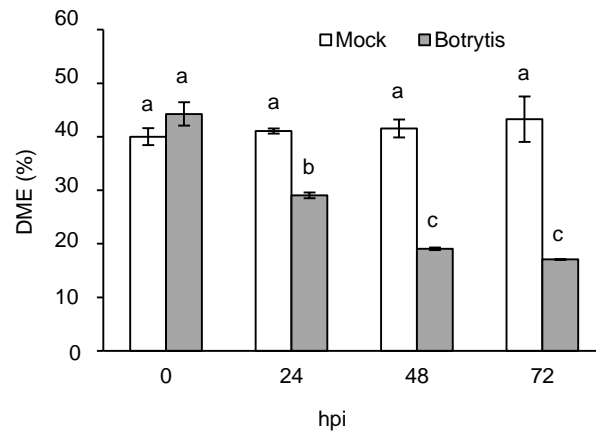

**Figure S11. Dynamic modifications of DME in *Arabidopsis* leaves during *Botrytis* infection.** The degree of pectin methylesterification (DME) was quantified in *Arabidopsis* leaves during *Botrytis* infection. The DME was quantified and expressed as methanol to uronic acid molecular ratio (%). hpi = hours post-inoculation. Results represent the mean  $\pm$  SD (n = 3). The different letters indicate datasets significantly different according to analysis of variance (ANOVA) followed by Tukey's test ( $P < 0.05$ ). The experiments were repeated three times with similar results.

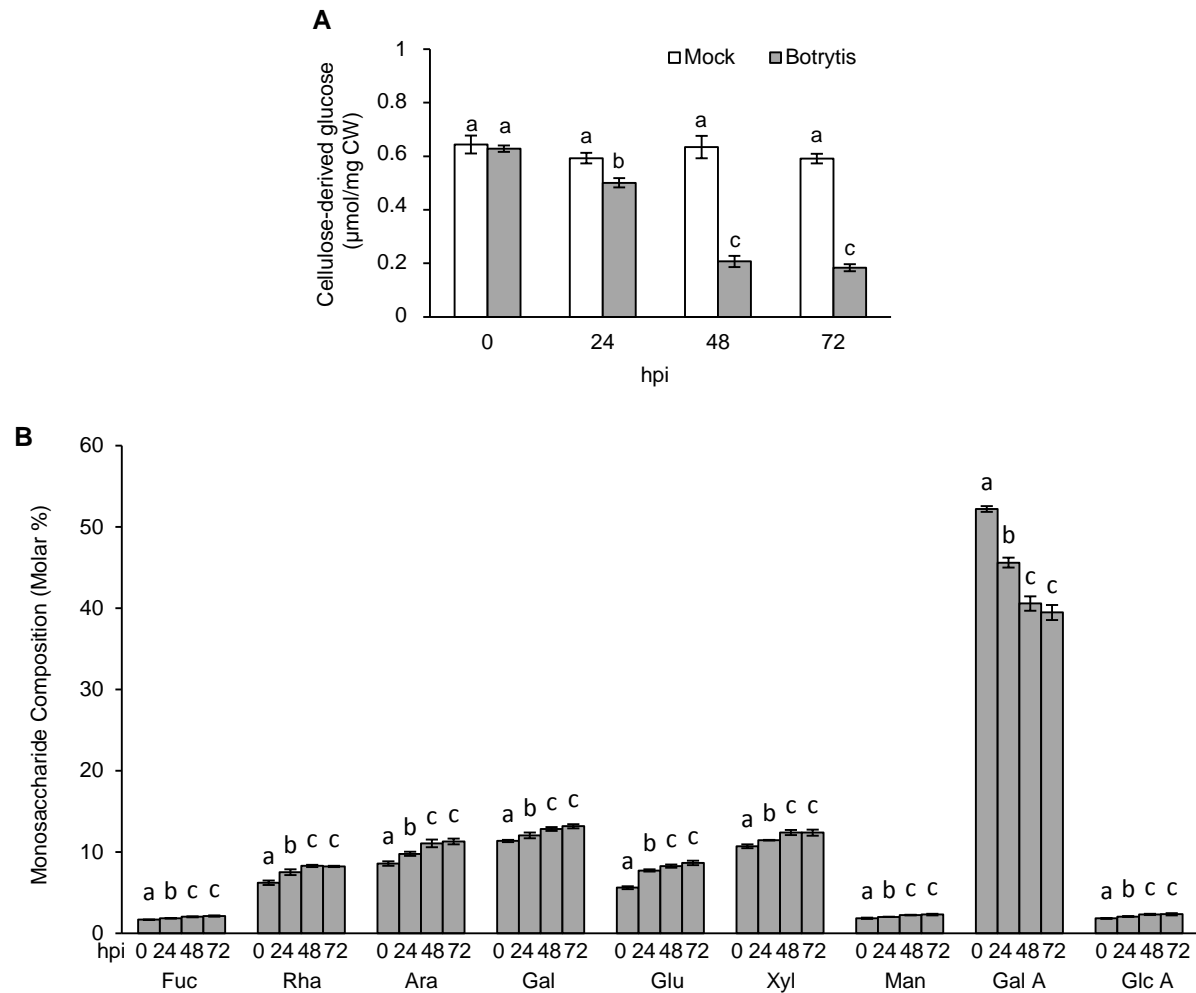

**Figure S12. Dynamic modifications of CW in *Arabidopsis* leaves during *Botrytis* infection.** The monosaccharide composition of cell wall was monitored in *Arabidopsis* WT leaves challenged with *Botrytis* and mock inoculated leaves. A, Cellulose-derived glucose. B, The molar percentages of fucose (Fuc), rhamnose (Rha), arabinose (Ara), galactose (Gal), glucose (Glu), xylose (Xyl), mannose (Man), galacturonic acid (Gal A) and glucuronic acid (Glc A) released after 2M TFA hydrolysis were quantified by high-performance anion-exchange chromatography with pulsed amperometric detection (HPAEC-PAD) system. The results represent the mean  $\pm$  SD ( $n = 3$ ). The different letters for each monosaccharide indicate datasets significantly different according to analysis of variance (ANOVA) followed by Tukey's test ( $P < 0.05$ ). The experiments were repeated three times with similar results.

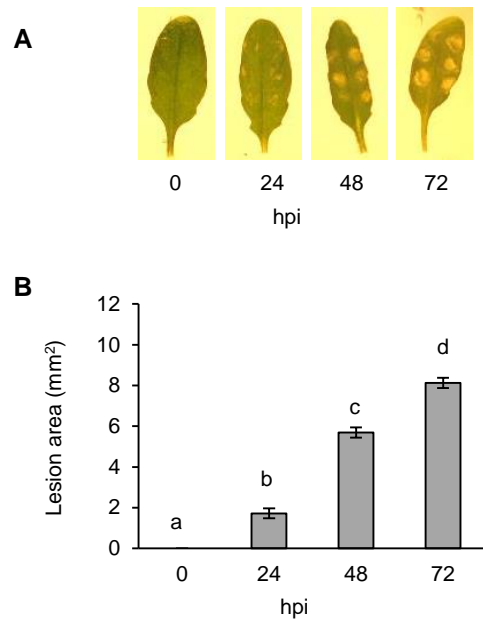

**Figure S13. Evaluation of Arabidopsis susceptibility during *B. cinerea* infection.** A, Representative pictures of *Arabidopsis* WT leaves challenged with *Botrytis* at different hours post inoculation (hpi). B, Measurements of lesion areas at different hpi. The values represent the mean  $\pm$  SD (n = 36). The different letters indicate datasets significantly different according to analysis of variance (ANOVA) followed by Tukey's test ( $P < 0.05$ ). This experiment was repeated three times with similar results.

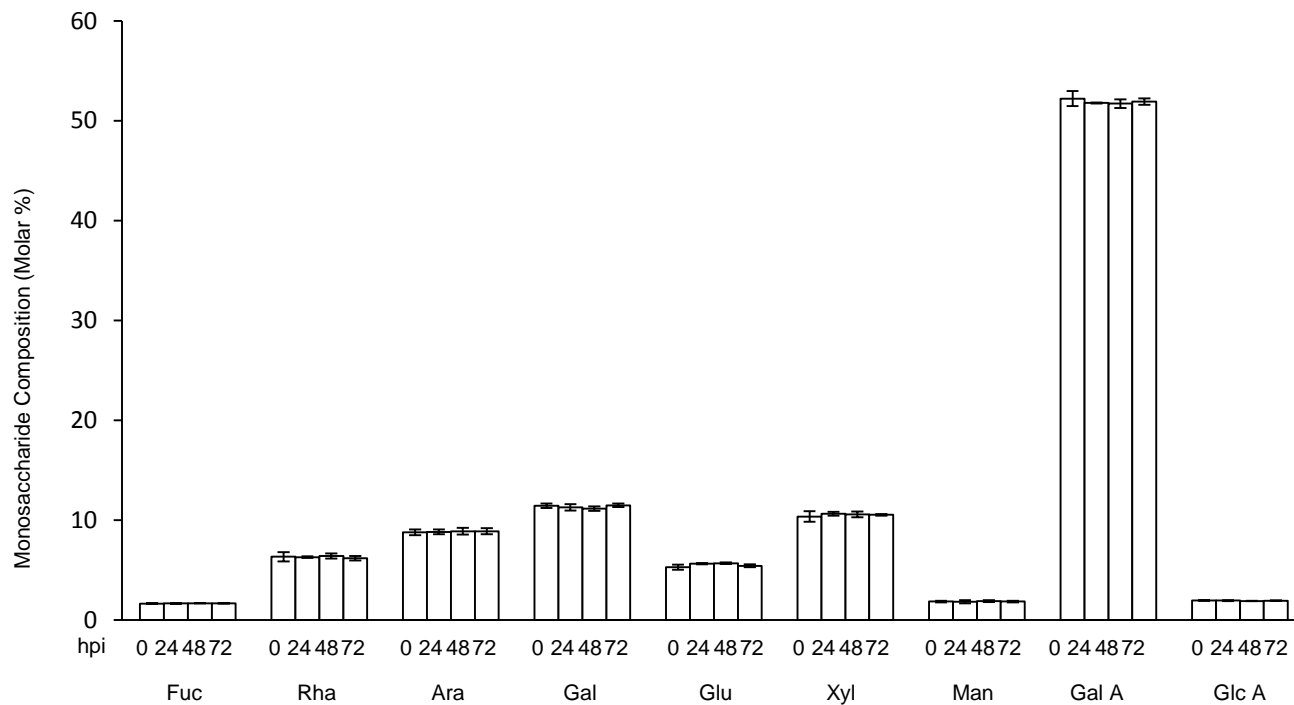

**Figure S14. Monosaccharide composition at different time points of CW of mock inoculated leaves of *Arabidopsis WT* plants.** The molar percentages of fucose (Fuc), rhamnose (Rha), arabinose (Ara), galactose (Gal), glucose (Glu), xylose (Xyl), mannose (Man), galacturonic acid (Gal A) and glucuronic acid (Glc A) released after 2M TFA hydrolysis were quantified by high-performance anion-exchange chromatography with pulsed amperometric detection (HPAEC-PAD) system. The values are mean  $\pm$  SD ( $n = 3$ ). Not significantly differences were observed for each monosaccharide according to analysis of variance (ANOVA) followed by Tukey's test ( $P > 0.05$ ). hpi = hours post-inoculation. The experiment was repeated three times with similar results.

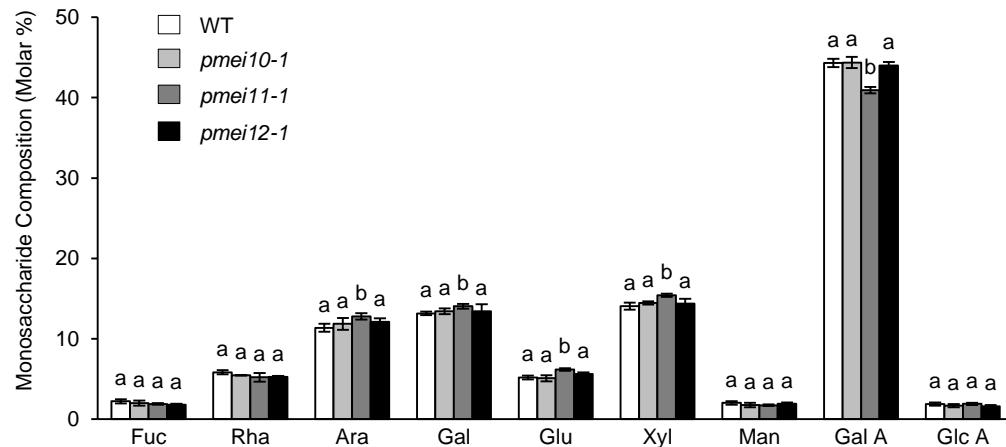

**Figure S15. Monosaccharide composition of CW of mock inoculated leaves of *Arabidopsis* WT and *pmei* mutants.** The monosaccharide composition of matricial cell wall polysaccharides was monitored in mock-inoculated leaves of six weeks-old *Arabidopsis* WT and *pmei* mutants. The molar percentages of fucose (Fuc), rhamnose (Rha), arabinose (Ara), galactose (Gal), glucose (Glu), xylose (Xyl), mannose (Man), galacturonic acid (Gal A) and glucuronic acid (Glc A) released after 2M TFA hydrolysis were quantified by high-performance anion-exchange chromatography with pulsed amperometric detection (HPAEC-PAD) system. The results represent the mean  $\pm$  SD ( $n = 3$ ). The different letters for each monosaccharide indicate datasets significantly different according to analysis of variance (ANOVA) followed by Tukey's test ( $P < 0.05$ ). The experiments were repeated three times with similar results.

GCOS expression signal (TGT=100, Bkg=20)

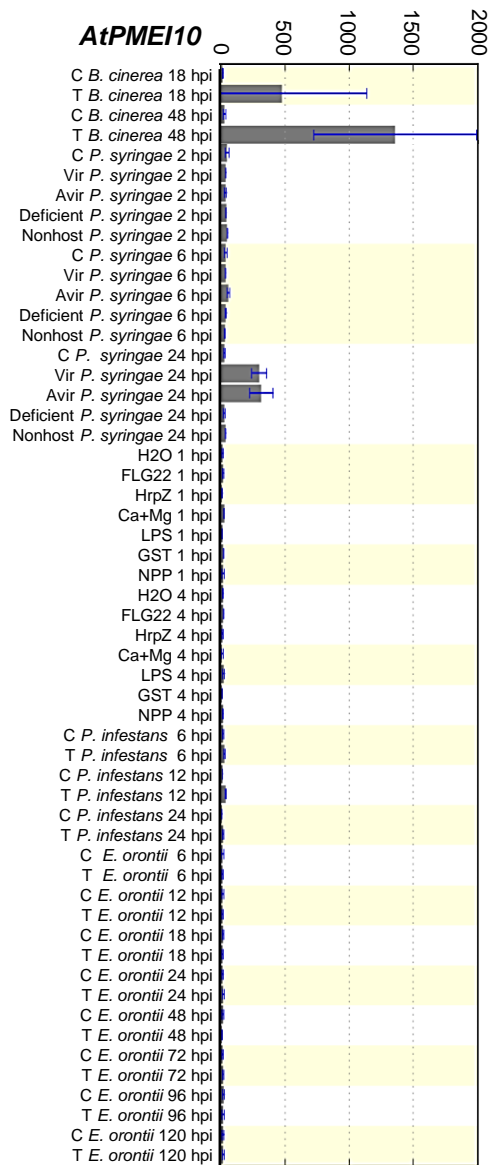

GCOS expression signal (TGT=100, Bkg=20)

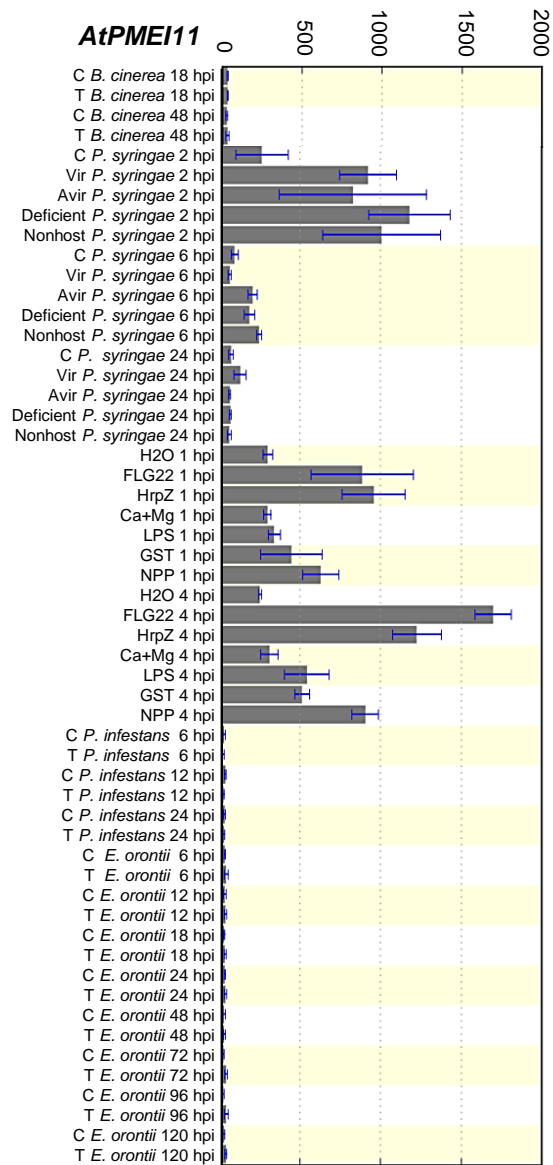

GCOS expression signal (TGT=100, Bkg=20)

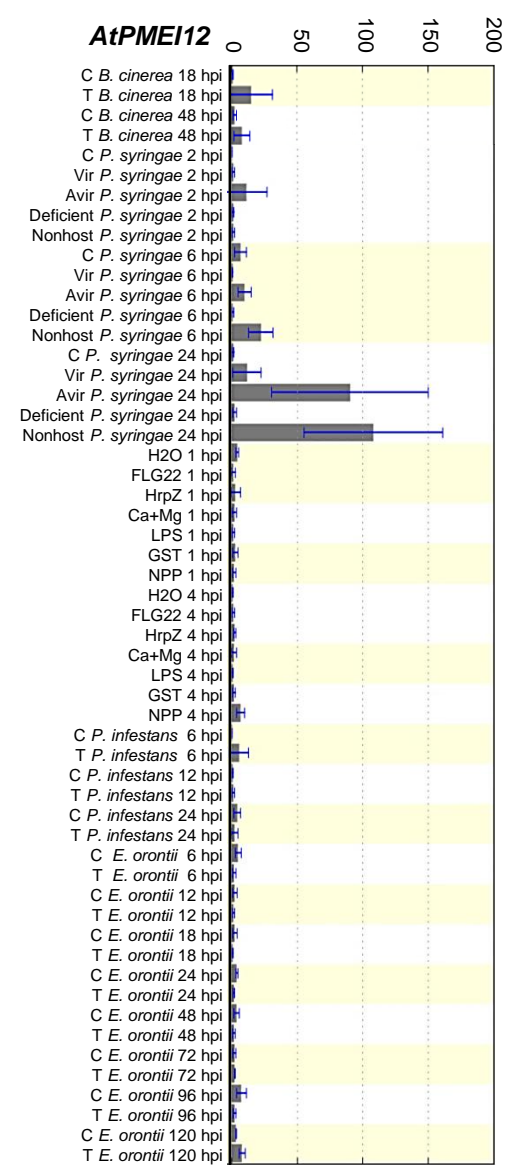

**Figure S16. AtPMEI10, AtPMEI11 and AtPMEI12 gene expression during infection of Arabidopsis with different pathogens and follow treatment with several elicitors.** ATH1 microarray data were gathered and processed using the eFP browser (Winter et al., 2007). Expression signals were generated by the eFP browser using the Gene Chip Operating Signal (GCOS) using target intensity (TGT) and background (bkg) values as indicated in figure. C; Control. T; Treatment. Vir; Virulent. Avir; Avirulent.



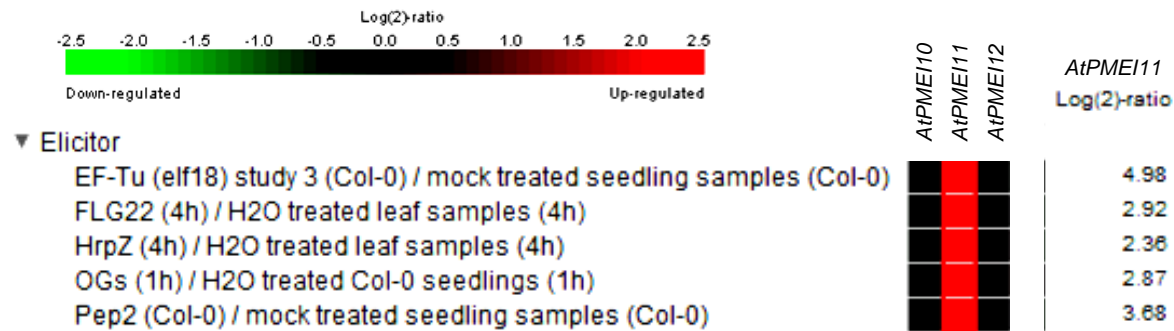

**Figure S17. Expression pattern of *AtPMEI10*, *AtPMEI11* and *AtPMEI12* mRNA in *Arabidopsis* in response to different PAMPs, effectors and DAMPs.** Elongation factor-thermo-unstable (EF-Tu - elf18), flagellin (flg22). Effector; HrpZ. DAMPs; oligogalacturonides (OGs) and Pep2. Data were analyzed using the Geneinvestigator Meta-Analyzer Tools ([www.geneinvestigator.ethz.ch/at/](http://www.geneinvestigator.ethz.ch/at/)). The specific expression level of *AtPMEI11* is indicated as Log(2)-ratio in treated plants relative to corresponding control.

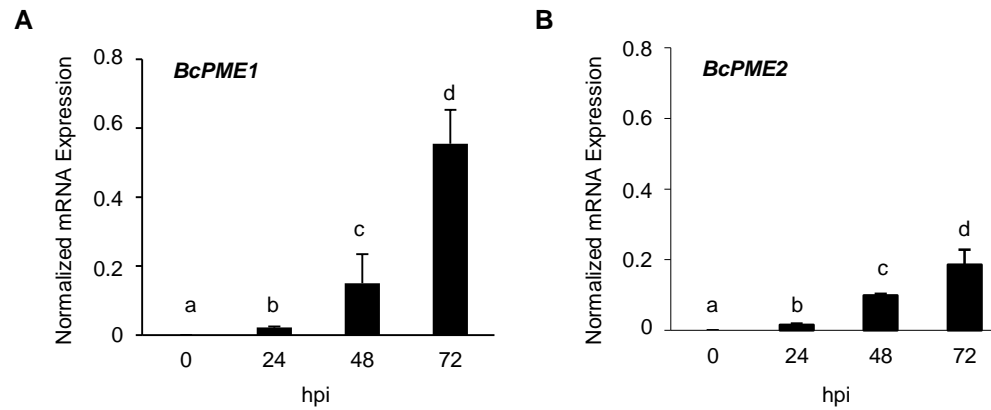

**Figure S18. Level and kinetic of expression of *Botrytis* PMEs during infection.** The expression of fungal *BcPME1* (A) and *BcPME2* (B) genes in *Arabidopsis* WT infected leaves was analysed by qPCR at 24, 48 and 72 hour post infection. In the figure the expression levels of each genes normalized to the *Botrytis Bc β-tubulin 2* expression is reported. The values represent the mean  $\pm$  SD (n = 6). The different letters indicate datasets significantly different according to analysis of variance (ANOVA) followed by Tukey's test ( $P < 0.01$ ).
